# Supplementary material for: Glucose oxidase-directed, instant synthesis of Mn-doped ZnS quantum dots in neutral media with retained enzymatic activity: mechanistic study and biosensing application
Source: Royal Society of Chemistry journal article supplement (doi:10.1039/c5tb00917k), 2015-01-01
Supplement: c5tb00917k1.pdf [file c5tb00917k1.pdf]

1 **Electronic Supplementary Information**

2

3 **Glucose Oxidase-Directed, Instant Synthesis of Mn-doped**  
4 **ZnS Quantum Dots in Neutral Media with Retained Enzymatic**  
5 **Activity: Mechanistic Study and Biosensing Application**

6

7 Jinyi Zhang,<sup>†</sup> Airu Zhu,<sup>†</sup> Ting Zhao,<sup>†</sup> Lan Wu,<sup>\*, ‡</sup> Peng Wu,<sup>\*, ‡</sup> and Xiandeng  
8 Hou<sup>†, ‡</sup>

9

10 <sup>†</sup>College of Chemistry, <sup>‡</sup>Analytical & Testing Center, Sichuan University, 29  
11 Wangjiang Road, Chengdu 610064, China

12

13 Corresponding authors' E-mails: wupeng@scu.edu.cn; wulan@scu.edu.cn

14

15

16

17

18

19

20

21

22

# 1. Experimental Section

## 2. Materials and chemicals

Glucose oxidase (GOD,  $> 100 \text{ IU mg}^{-1}$ , Shanghai Sangon), bovine serum albumin (BSA) and papain (Sigma-Aldrich), lysozyme and pepsin (Newprobe Biotechnology Co., Beijing), horseradish peroxidase (HRP,  $> 160 \text{ IU mg}^{-1}$ , Aladin), 3,3',5,5'-tetramethylbenzidine (TMB, Aladin, Shanghai, China), D-glucose and  $\text{H}_2\text{O}_2$  (Kelong Chemical, Chengdu, China),  $\text{ZnAc}_2 \cdot 7\text{H}_2\text{O}$ ,  $\text{MnAc}_2 \cdot 4\text{H}_2\text{O}$ , and  $\text{Na}_2\text{S} \cdot 9\text{H}_2\text{O}$  (Aladin) and Tris (Sinopharm Chemical Reagent Co., Ltd) were used in this work. 1-Acetylimidazole (NAI, 98.0%), N-succinimidyl N-methylcarbamate (NHS, 97.0%), and diethylpyrocarbonate (DEPC, 99.0%), N-ethylmaleimide (99.0%), methylamine (40% w/w aq. solution), and 1-(3-dimethylaminopropyl)-3-ethylcarbodiimide hydrochloride (EDC, 98.0%) were purchased from Aladin (Shanghai, China). Ultrapure water ( $18.2 \text{ M}\Omega \text{ cm}$ ) from a water purification system (PCUJ-10, Chengdu Pure Technology Co., Ltd., Chengdu, China).

15

## 16. Synthesis of GOD-Mediated Mn-doped ZnS QDs

For preparation of GOD-mediated Mn-doped ZnS QDs,  $30 \mu\text{L}$  GOD ( $10 \text{ mg mL}^{-1}$ ),  $20 \mu\text{L}$   $\text{MnAc}_2$  (1 mM),  $39 \mu\text{L}$   $\text{ZnAc}_2$  (20 mM) and  $50 \mu\text{L}$  Tris-HCl solution (pH = 6.5, 0.1 M) were added to  $325 \mu\text{L}$  ultrapure water for five minutes in room temperature. Then  $36 \mu\text{L}$   $\text{Na}_2\text{S}$  (20 mM) was quickly injected into the precursor solution above followed gently vortexing in room temperature. Phosphorescent GOD-capped Mn-doped ZnS QDs were thus obtained.

## 1 **Characterization**

2 Phosphorescence, fluorescence and phosphorescence lifetime were performed using  
3 an F-7000 spectrofluorometer (Hitachi, Japan) equipped with a plotter unit and a  
4 quartz cell (1 cm × 1 cm). The voltage of the photomultiplier tube (PMT) was set at  
5 700 V. The excitation wavelength was set at 310 nm for phosphorescence,  
6 fluorescence and phosphorescence lifetime measurements. Absorption spectra were  
7 recorded using a UV-1700 UV/Vis spectrophotometer (Shimadzu, Japan). HRTEM  
8 images of QDs were obtained using a Tecnai G2 F20 S-TWIN transmission electron  
9 microscope at an accelerating voltage of 200 kV (FEI Co., USA). The polyacrylamide  
10 gel electrophoresis (PAGE) was performed using JY-SCZ2+ electrophoresis  
11 apparatus (Jun Yi-Dong Fang, Beijing, China). Circular dichroism (CD) spectrum was  
12 performed using JASCO J-A500-150 spectrometer. The polyacrylamide gel images  
13 and luminous QDs images (under UV irradiation 302 nm) were taken with a Nikon  
14 D300S digital camera.

15

## 16 **2. Optimization of the Synthetic conditions for Mn-ZnS QDs**

17 In this work, we employed the GOD as the template for directing the synthesis of Mn-  
18 doped ZnS QDs in one second and in neutral aqueous media at room temperature. The  
19 doping amount of  $Mn^{2+}$  plays a key roles in the process, so various amounts of  
20  $Mn(Ac)_2$  adding to  $Zn(Ac)_2$  solution in the presence of GOD were studied. As shown  
21 in Figure S1A, the emission color of the QDs changed immediately after  
22 incorporation of  $Mn^{2+}$ . When reached 2.5% dopant amount, the highest

1 phosphorescence QDs was obtained (Figure S1B) and therefore used in further  
2 investigations.

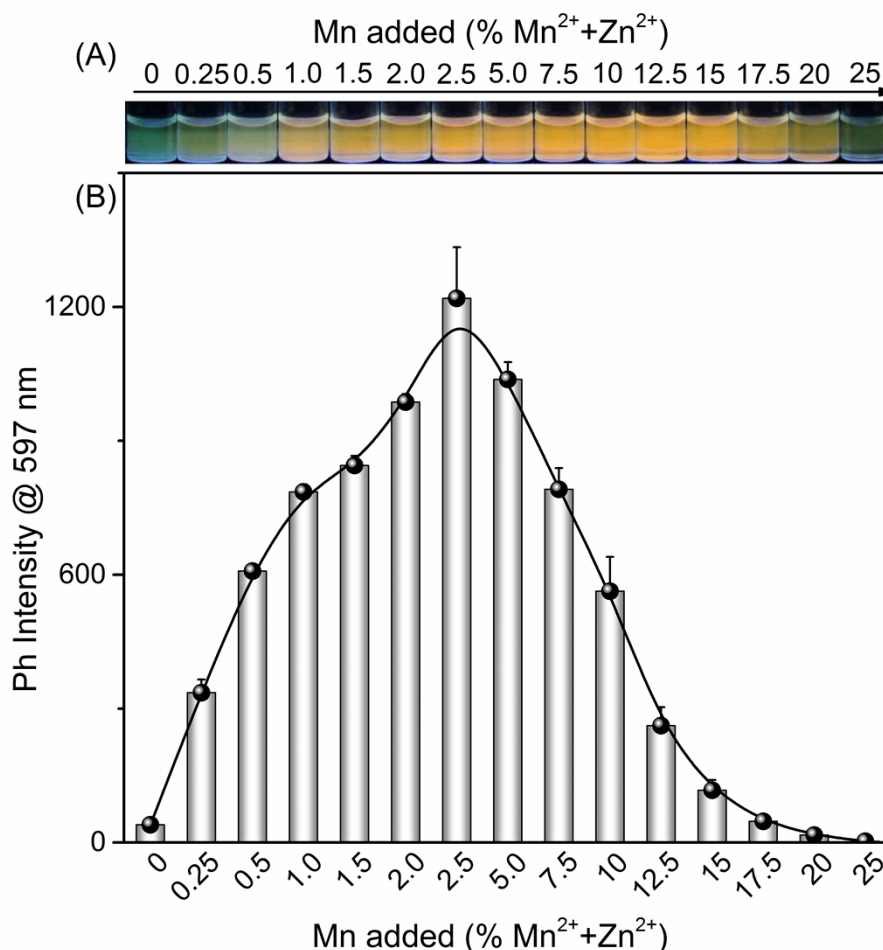

3  
4 **Figure S1.** (A) Fluorescent photographs of UV-excited GOD-Mediated Mn-doped ZnS  
5 QDs with increasing Mn<sup>2+</sup> concentration ( $\lambda_{\text{ex}} = 302 \text{ nm}$ ). (B) Phosphorescence intensity of  
6 GOD-mediated Mn-doped ZnS QDs at 597 nm mineralized in the presence of indicated  
7 amount of Mn<sup>2+</sup> ( $\lambda_{\text{ex}} = 310 \text{ nm}$ ).

8 In order to achieve higher phosphorescence, the concentration of S<sup>2-</sup> and pH of  
9 the buffer solution were investigated. As shown in Figure S2, when the ratio of S<sup>2-</sup> :  
10 (Mn<sup>2+</sup> + Zn<sup>2+</sup>) was set at 0.9, the highest phosphorescence was obtained. It is worth  
11 nothing that the amount of S<sup>2-</sup> was not equal to that of cations. It is possible that  
12 excessive amount of S<sup>2-</sup> would increase the degree of surface defects, which may

1 result in decreasing the light intensity of QDs. One can also see from Figure S3 that  
2 the absorbance of QDs increased to the maximum when the  $S^{2-}$  ratio was set at 0.9.  
3 Investigations on the pH of synthetic media revealed that 0.01 M, pH 6.5 Tris-HCl  
4 buffer was optimal for synthesis of Mn-ZnS QDs (Figure S4).  
5

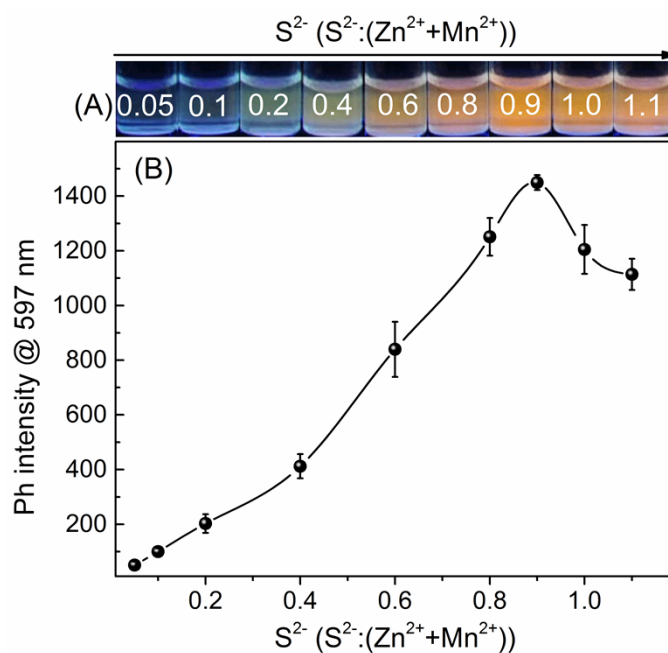

6  
7 **Figure S2.** (A) Fluorescent photographs of UV-excited GOD-mediated Mn-doped ZnS  
8 QDs with increase of concentration of  $S^{2-}$  ( $\lambda_{ex} = 302$  nm). (B) Phosphorescence intensity  
9 of GOD-mediated Mn-doped ZnS QDs at 580 nm mineralized in the presence of  
10 indicated amount of  $S^{2-}$  ( $\lambda_{ex} = 310$  nm). The slit width was 10 and 10 nm for excitation  
11 and emission, respectively.  
12

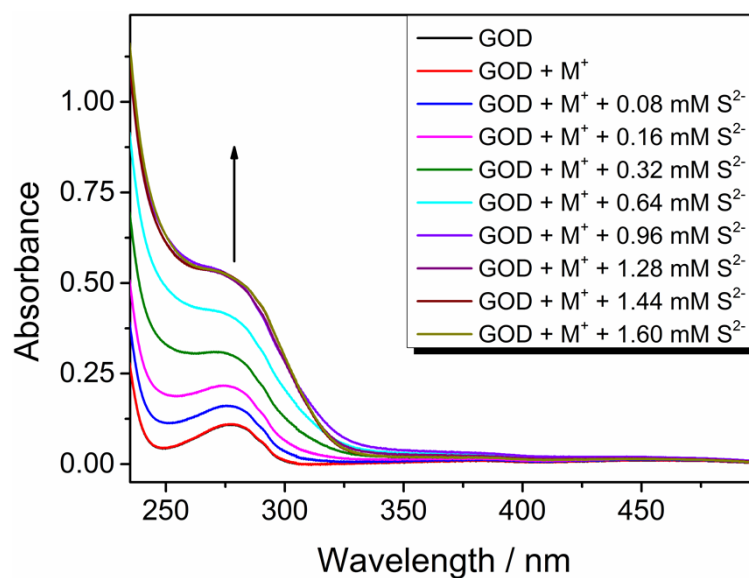

1

2 **Figure S3.** Absorption spectra of GOD-Mediated Mn-ZnS QDs synthesized at different

3 amount of  $S^{2-}$ .

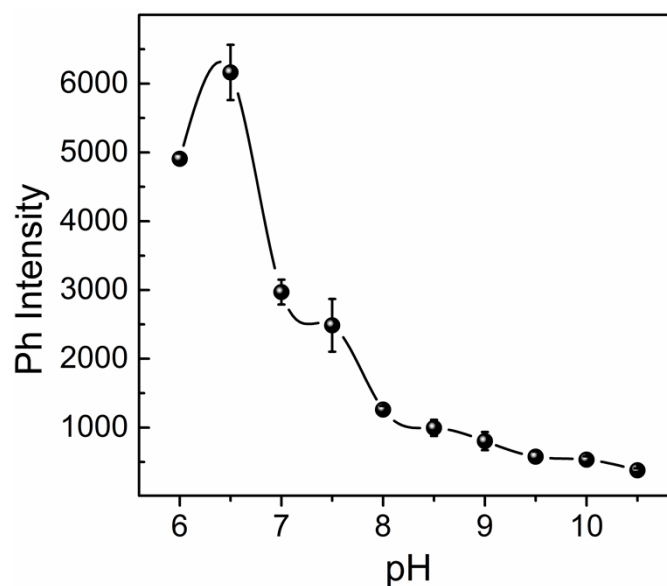

4

5 **Figure S4.** Optimization of pH in the synthetic conditions for GOD-mediated Mn-doped

6 ZnS QDs (Tris-HCl 0.01 M).

7

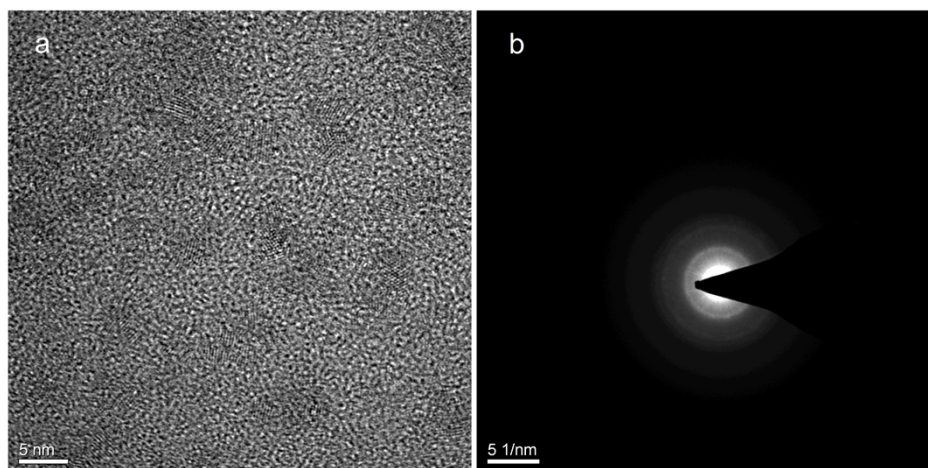

1

2 **Figure S5.** High-magnification TEM image (a) and selected area diffraction (SAD, b) of  
 3 the as-prepared Mn-doped ZnS QDs.

4

### 5 **3. Enzymatic activity assay**

6 To carry out the enzymatic activity assay, we obtained a standard curve of H<sub>2</sub>O<sub>2</sub> and  
 7 absorbance of TMB firstly. Then the free and QDs-bound GOD enzymes (2 mg mL<sup>-1</sup>,  
 8 20 μL) were mixed in 3 mL of phosphate-buffered saline (PBS, 10 mM, pH = 6.5)  
 9 containing 10 μL of HRP (2 mg mL<sup>-1</sup>), 20 μL TMB (5 mg mL<sup>-1</sup>, dissolving in ethanol)  
 10 and various concentrations of glucose as a substrate separately. The absorbance was  
 11 recorded at 652 nm. The value of the  $K_m$ , which gives an indication of the enzyme-  
 12 substrate kinetics, was determined by the analysis of the slope of enzymatic reactions.  
 13 The  $K_m$  value for an enzymatic reaction determines the affinity of the enzyme for the  
 14 substrate. These parameters have been estimated using the Lineweaver-Bruke plot:

$$\frac{1}{v} = \frac{K_m}{V_{\max}} \frac{1}{[S]} + \frac{1}{V_{\max}}$$

15

$$V_{\max} = k_{\text{cat}} [E]_0$$

16

17 Table S1 Kinetic parameters of free GOD and GOD after directing the synthesis of QDs.

| GOD conditions <sup>a</sup> | $K_m$ (mM) | $k_{cat}$ (1/s) | $k_{cat}/K_m$ (1/M*s) |
|-----------------------------|------------|-----------------|-----------------------|
| Free GOD                    | 1.3        | 25.66           | $1.97 \times 10^4$    |
| 25 °C, instant, pH 6.5      | 1.0        | 22.84           | $2.28 \times 10^4$    |
| 37 °C, 4 days, pH 6.5       | 1.1        | 21.02           | $1.91 \times 10^4$    |
| 50 °C, 3 h, pH 6.5          | 3.2        | 41.62           | $1.30 \times 10^4$    |
| 60 °C, 3 h, pH 6.5          | 7.1        | 24.47           | $3.43 \times 10^3$    |
| 70 °C, 3 h, pH 6.5          | $\infty$   | 0               | 0                     |
| 25 °C, instant, pH 6        | 1.5        | 28.62           | $1.95 \times 10^4$    |
| 25 °C, instant, pH 7        | 1.6        | 23.35           | $1.46 \times 10^4$    |
| 25 °C, instant, pH 8        | 5.0        | 50.99           | $1.02 \times 10^4$    |
| 25 °C, instant, pH 9        | 5.2        | 49.3            | $9.42 \times 10^3$    |
| 25 °C, instant, pH 10       | 11.2       | 95.32           | $8.54 \times 10^3$    |
| 25 °C, instant, pH 11       | 12.4       | 83.07           | $6.68 \times 10^3$    |

1

2

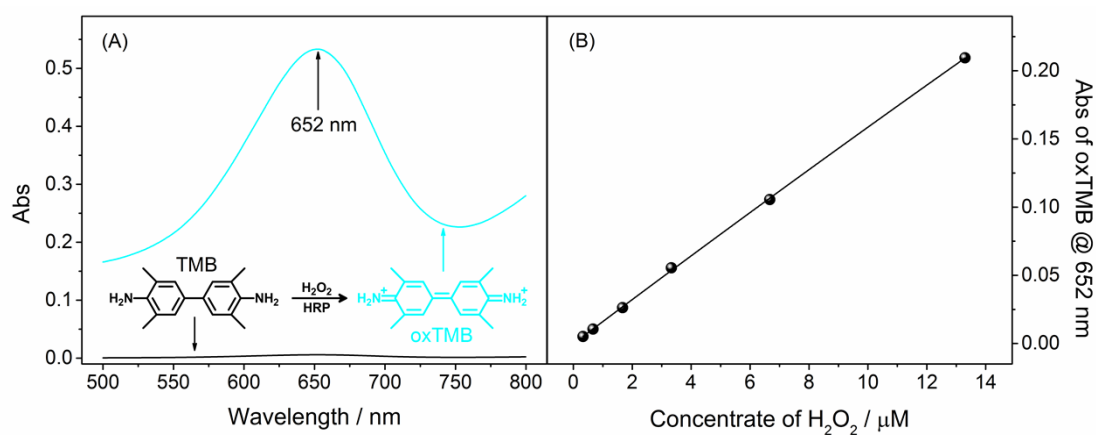

3

4 **Figure S6.** (A) Absorption spectra of TMB and oxidized TMB; and (B) calibration curve of  
5 H<sub>2</sub>O<sub>2</sub> versus absorbance of oxidized TMB (@652 nm).

6

7



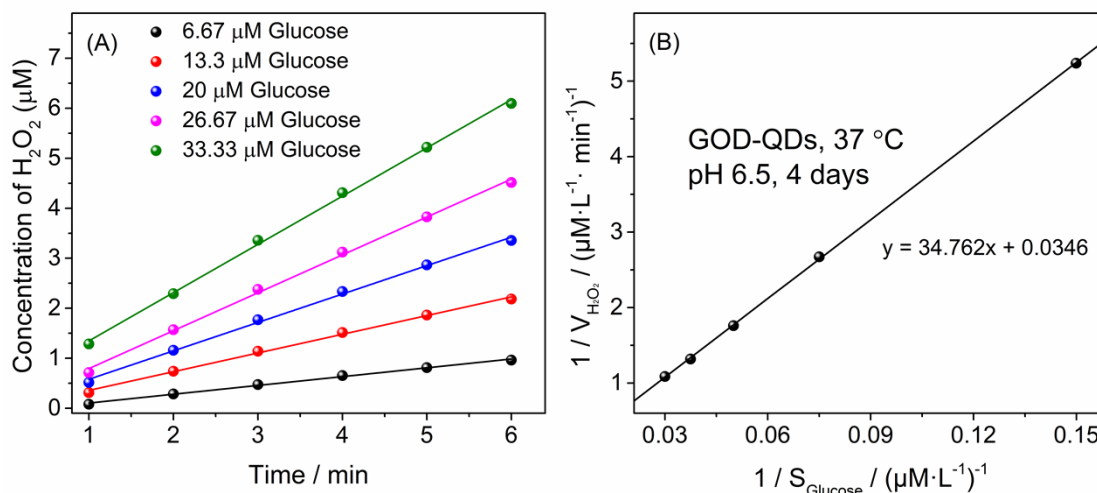

1

2 **Figure S7.** (A) The generation velocity of H<sub>2</sub>O<sub>2</sub> (measured *versus* the calibration curve  
 3 shown in Figure S6B) in the presence of different amounts of glucose catalyzed by GOD  
 4 after directing the synthesis of Mn-ZnS QDs (GOD: 4 μg/mL, HRP: 6.7μg/mL; synthetic  
 5 conditions: 37 °C, pH 6.5 Tris-HCl buffer, and 4 days); and (B) the corresponding  
 6 Lineweaver-Burk plot.

7

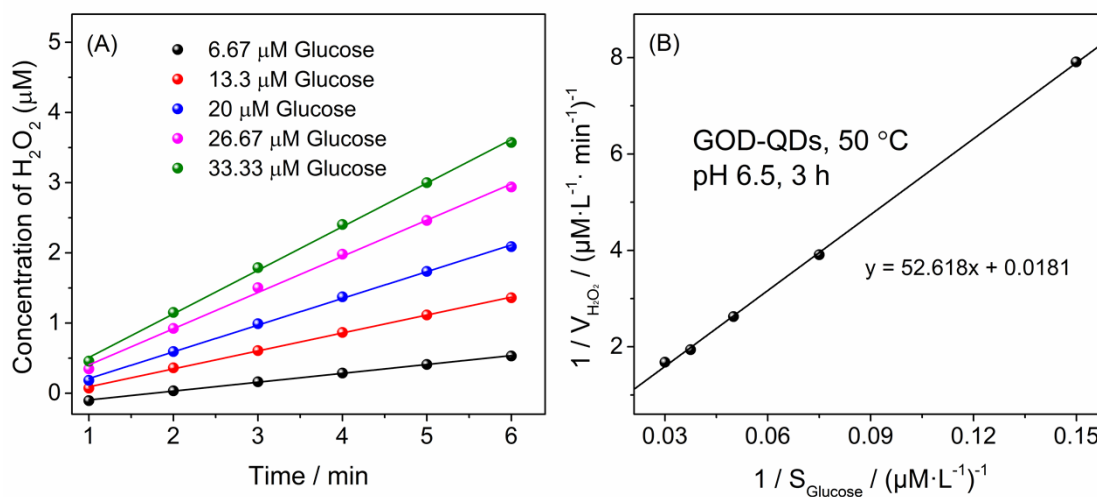

8

9 **Figure S8.** (A) The generation velocity of H<sub>2</sub>O<sub>2</sub> (measured *versus* the calibration curve  
 10 shown in Figure S6B) in the presence of different amounts of glucose catalyzed by GOD  
 11 after directing the synthesis of Mn-ZnS QDs (GOD: 4 μg/mL, HRP: 6.7μg/mL; synthetic  
 12 conditions: 50 °C, pH 6.5 Tris-HCl buffer, and 3 h); and (B) the corresponding  
 13 Lineweaver-Burk plot.

14

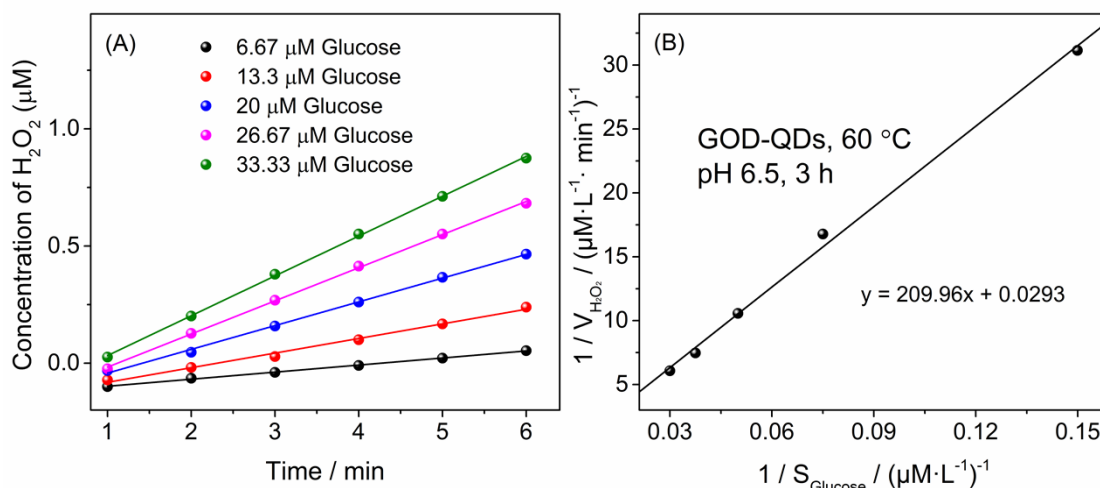

1

2 **Figure S9.** (A) The generation velocity of H<sub>2</sub>O<sub>2</sub> (measured *versus* the calibration curve  
 3 shown in Figure S6B) in the presence of different amounts of glucose catalyzed by GOD  
 4 after directing the synthesis of Mn-ZnS QDs (GOD: 4 μg/mL, HRP: 6.7μg/mL; synthetic  
 5 conditions: 60 °C, pH 6.5 Tris-HCl buffer, and 3 h); and (B) the corresponding  
 6 Lineweaver-Burk plot.

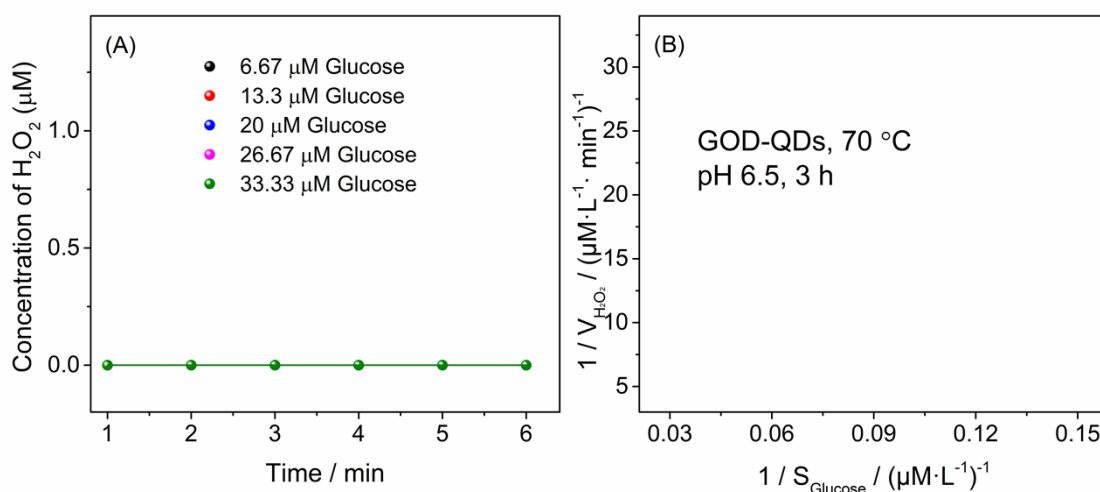

7

8 **Figure S10.** (A) The generation velocity of H<sub>2</sub>O<sub>2</sub> (measured *versus* the calibration curve  
 9 shown in Figure S6B) in the presence of different amounts of glucose catalyzed by GOD  
 10 after directing the synthesis of Mn-ZnS QDs (GOD: 4 μg/mL, HRP: 6.7μg/mL; synthetic  
 11 conditions: 70 °C, pH 6.5 Tris-HCl buffer, and 3 h); and (B) the corresponding  
 12 Lineweaver-Burk plot. At such conditions, the enzymatic activity of GOD was almost  
 13 completely lost. Therefore, no H<sub>2</sub>O<sub>2</sub> was generated and no TMB oxidation was observed.

14

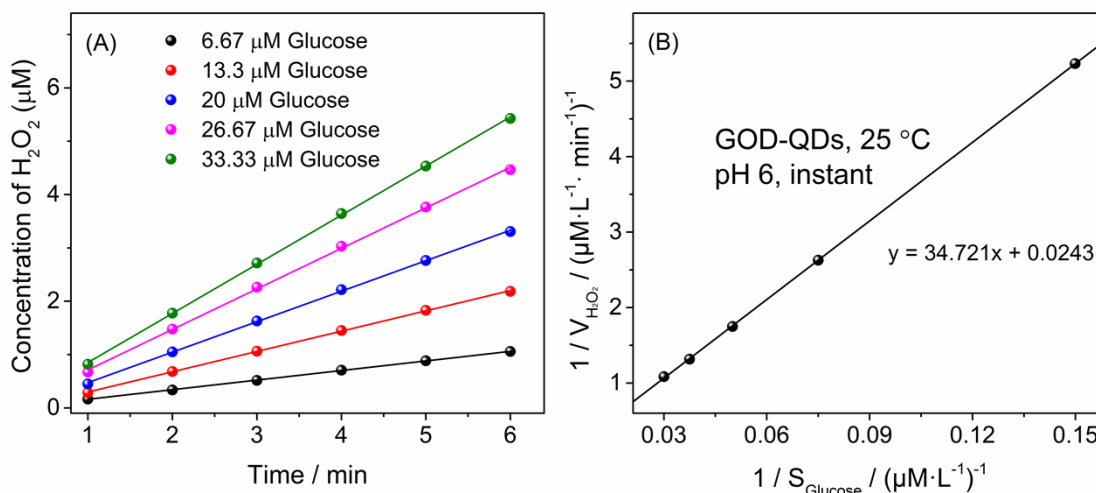

1

2 **Figure S11.** (A) The generation velocity of H<sub>2</sub>O<sub>2</sub> (measured *versus* the calibration curve  
 3 shown in Figure S6B) in the presence of different amounts of glucose catalyzed by GOD  
 4 after directing the synthesis of Mn-ZnS QDs (GOD: 4 μg/mL, HRP: 6.7μg/mL; synthetic  
 5 conditions: 25 °C, pH 6, Tris-HCl buffer, and instant); and (B) the corresponding  
 6 Lineweaver-Burk plot.

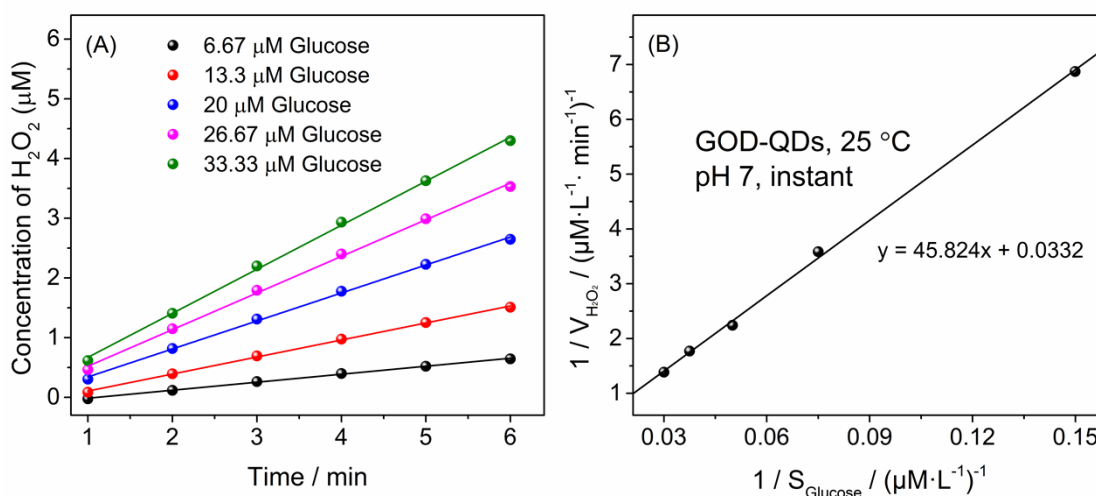

7

8 **Figure S12.** (A) The generation velocity of H<sub>2</sub>O<sub>2</sub> (measured *versus* the calibration curve  
 9 shown in Figure S6B) in the presence of different amounts of glucose catalyzed by GOD  
 10 after directing the synthesis of Mn-ZnS QDs (GOD: 4 μg/mL, HRP: 6.7μg/mL; synthetic  
 11 conditions: 25 °C, pH 7, Tris-HCl buffer, and instant); and (B) the corresponding  
 12 Lineweaver-Burk plot.

13

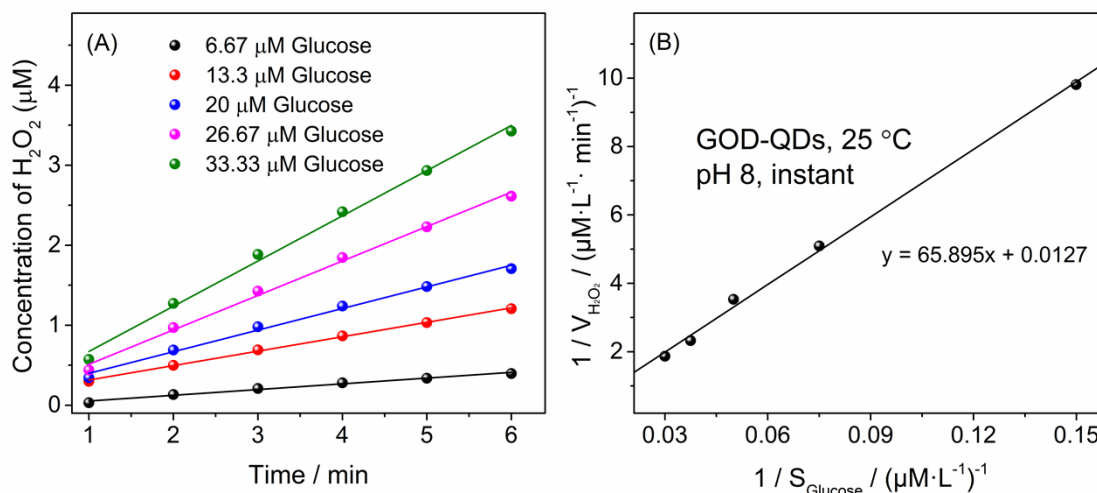

1

2 **Figure S13.** (A) The generation velocity of H<sub>2</sub>O<sub>2</sub> (measured *versus* the calibration curve  
 3 shown in Figure S6B) in the presence of different amounts of glucose catalyzed by GOD  
 4 after directing the synthesis of Mn-ZnS QDs (GOD: 4 μg/mL, HRP: 6.7μg/mL; synthetic  
 5 conditions: 25 °C, pH 8, Tris-HCl buffer, and instant); and (B) the corresponding  
 6 Lineweaver-Burk plot.

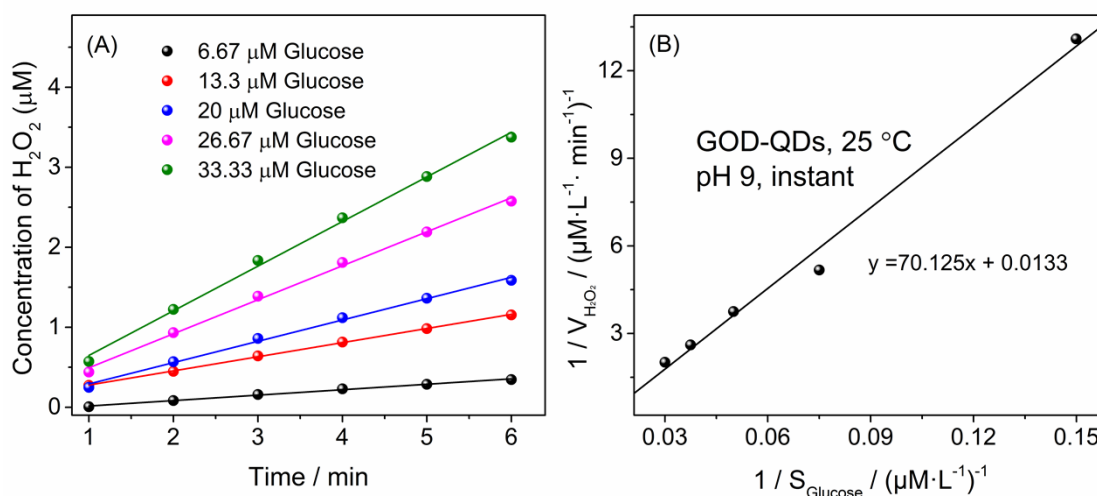

7

8 **Figure S14.** (A) The generation velocity of H<sub>2</sub>O<sub>2</sub> (measured *versus* the calibration curve  
 9 shown in Figure S6B) in the presence of different amounts of glucose catalyzed by GOD  
 10 after directing the synthesis of Mn-ZnS QDs (GOD: 4 μg/mL, HRP: 6.7μg/mL; synthetic  
 11 conditions: 25 °C, pH 9, Tris-HCl buffer, and instant); and (B) the corresponding  
 12 Lineweaver-Burk plot.

13

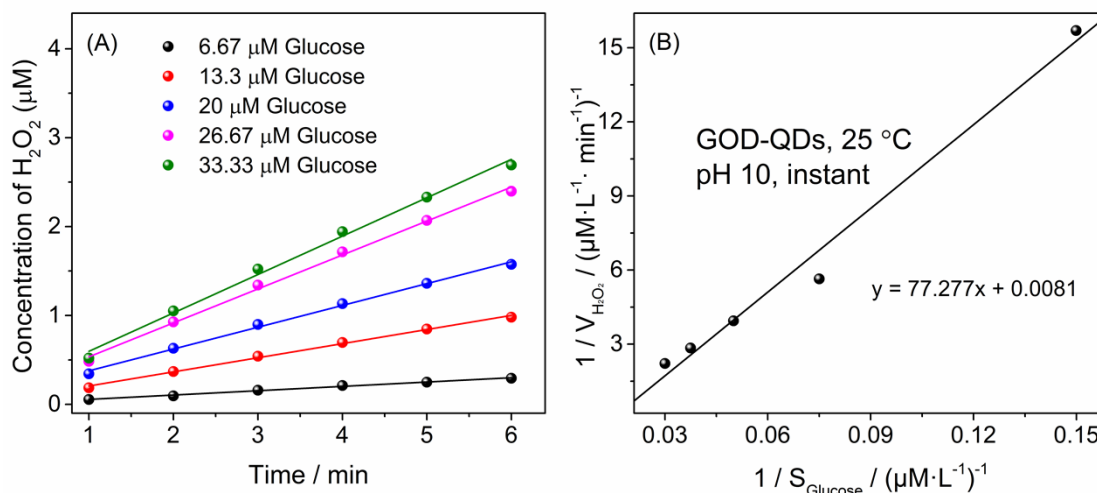

1

2 **Figure S15.** (A) The generation velocity of H<sub>2</sub>O<sub>2</sub> (measured *versus* the calibration curve  
 3 shown in Figure S6B) in the presence of different amounts of glucose catalyzed by GOD  
 4 after directing the synthesis of Mn-ZnS QDs (GOD: 4 μg/mL, HRP: 6.7μg/mL; synthetic  
 5 conditions: 25 °C, pH 10, Tris-HCl buffer, and instant); and (B) the corresponding  
 6 Lineweaver-Burk plot.

7

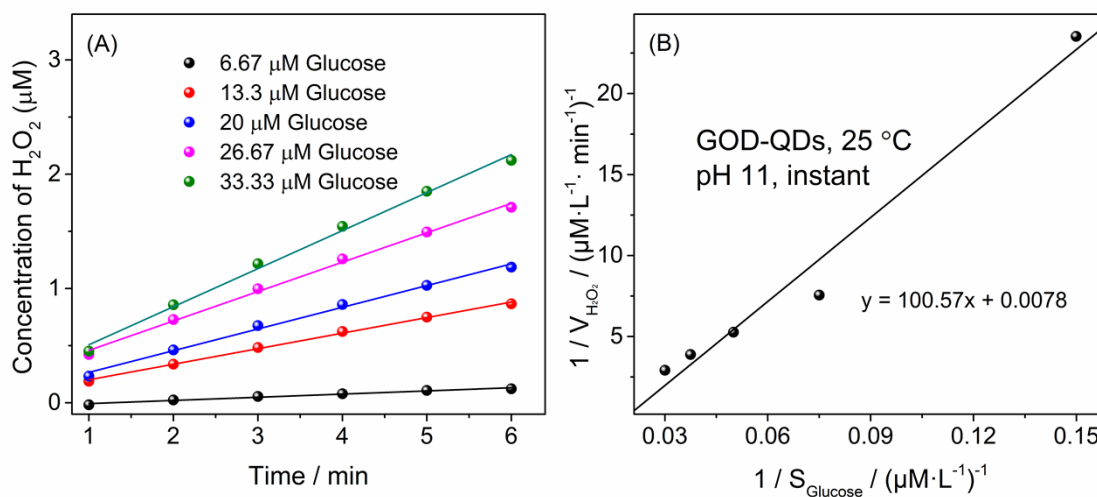

8

9 **Figure S16.** (A) The generation velocity of H<sub>2</sub>O<sub>2</sub> (measured *versus* the calibration curve  
 10 shown in Figure S6B) in the presence of different amounts of glucose catalyzed by GOD  
 11 after directing the synthesis of Mn-ZnS QDs (GOD: 4 μg/mL, HRP: 6.7μg/mL; synthetic  
 12 conditions: 25 °C, pH 11, Tris-HCl buffer, and instant); and (B) the corresponding  
 13 Lineweaver-Burk plot.

14

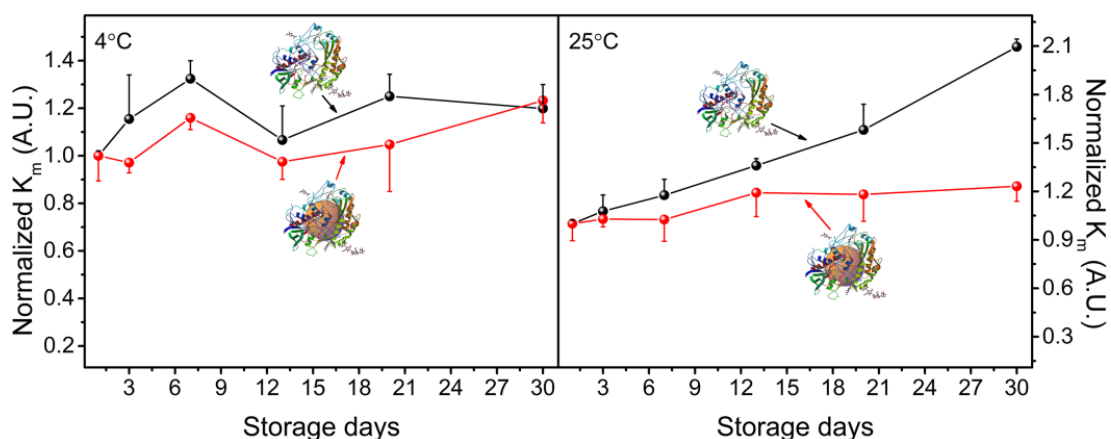

1

2 **Figure S17.** Normalized  $K_m$  of free GOD or GOD-QDs was been monitored under 4°C  
 3 and 25°C storage for one month, respectively.

4

5 **Table S2.** Enzymatic conformation information of free GOD or GOD after various  
 6 synthetic conditions using the self-consistent method from the CD spectra.

| Conformation                |                 |                |               |                     |                | total |
|-----------------------------|-----------------|----------------|---------------|---------------------|----------------|-------|
|                             | $\alpha$ -helix | $\beta$ -sheet | $\beta$ -turn | Polypro<br>II helix | Random<br>coil |       |
| Various GOD                 |                 |                |               |                     |                |       |
| Free GOD                    | 53.6            | 8.0            | 5.1           | 3.3                 | 32.5           | 100   |
| GOD-M <sup>+</sup> , pH 6.5 | 52.3            | 8.0            | 4.3           | 3.1                 | 33.4           | 100   |
| GOD-QDs, pH 6.5, instant    | 55.8            | 7.2            | 6.5           | 2.7                 | 24.9           | 100   |
| GOD-QDs, pH 6.5, 4 days     | 54.3            | 10.8           | 4.9           | 2.4                 | 27.9           | 100   |
| GOD-QDs, 50°C, 3 h          | 41.5            | 14.5           | 11.0          | 4.4                 | 32.0           | 100   |
| GOD-QDs, 60°C, 3 h          | 47.0            | 7.3            | 10.6          | 3.9                 | 32.0           | 100   |
| GOD-QDs, 70°C, 3 h          | 68.1            | 5.2            | 3.6           | 2.7                 | 20.7           | 100   |
| GOD-QDs, pH 6, instant      | 58.3            | 6.3            | 6.8           | 2.5                 | 23.6           | 100   |
| GOD-QDs, pH 7, instant      | 60.6            | 5.6            | 6.9           | 1.9                 | 22.3           | 100   |
| GOD-QDs, pH 8, instant      | 63.1            | 9.3            | 1.6           | 5.5                 | 22.0           | 100   |
| GOD-QDs, pH 9, instant      | 64.5            | 3.5            | 7.0           | 1.0                 | 24.6           | 100   |
| GOD-QDs, pH 10, instant     | 65.3            | 7.9            | 3.9           | 3.2                 | 21.2           | 100   |
| GOD-QDs, pH 11, instant     | 68.1            | 5.2            | 3.6           | 2.7                 | 20.7           | 100   |

7

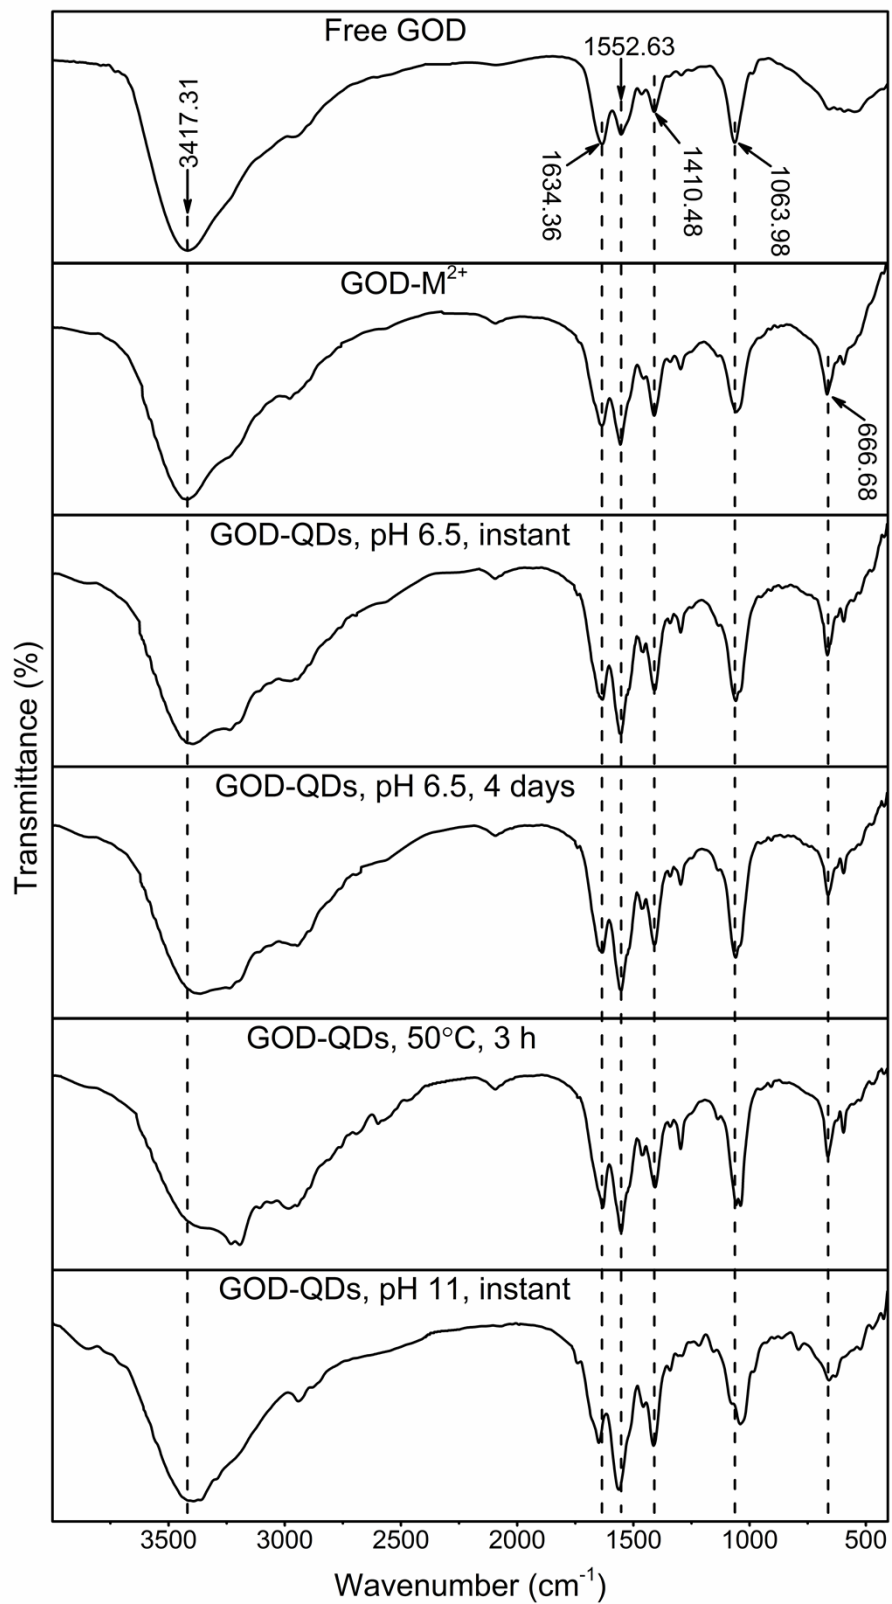

1  
 2 **Figure S18.** FT-IR spectra of free GOD, GOD-metal ions and GOD-capped Mn-ZnS QDs.

3

4

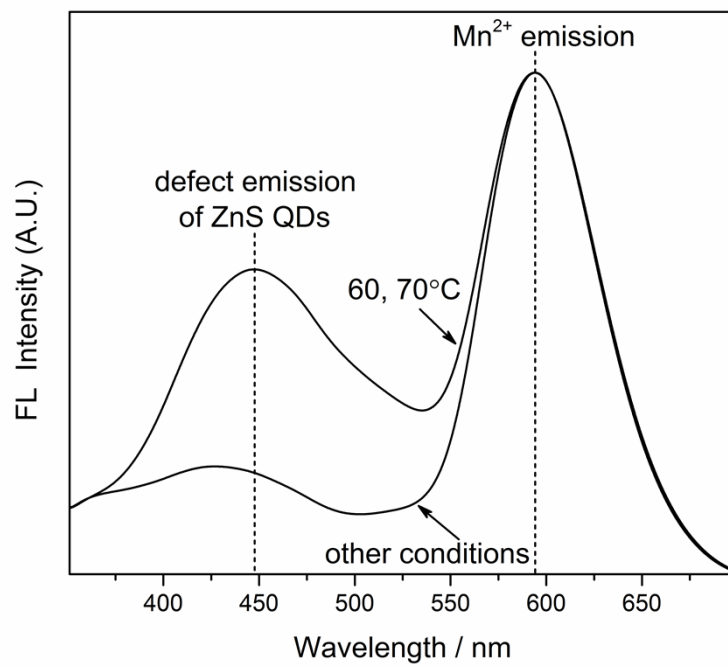

1

2 **Figure S19.** Fluorescence emission spectra (Ex: 310 nm) of GOD-Mn-ZnS QDs

3 synthesized at 60 and 70 °C and other conditions.

4



## 1 4. Photostability investigation

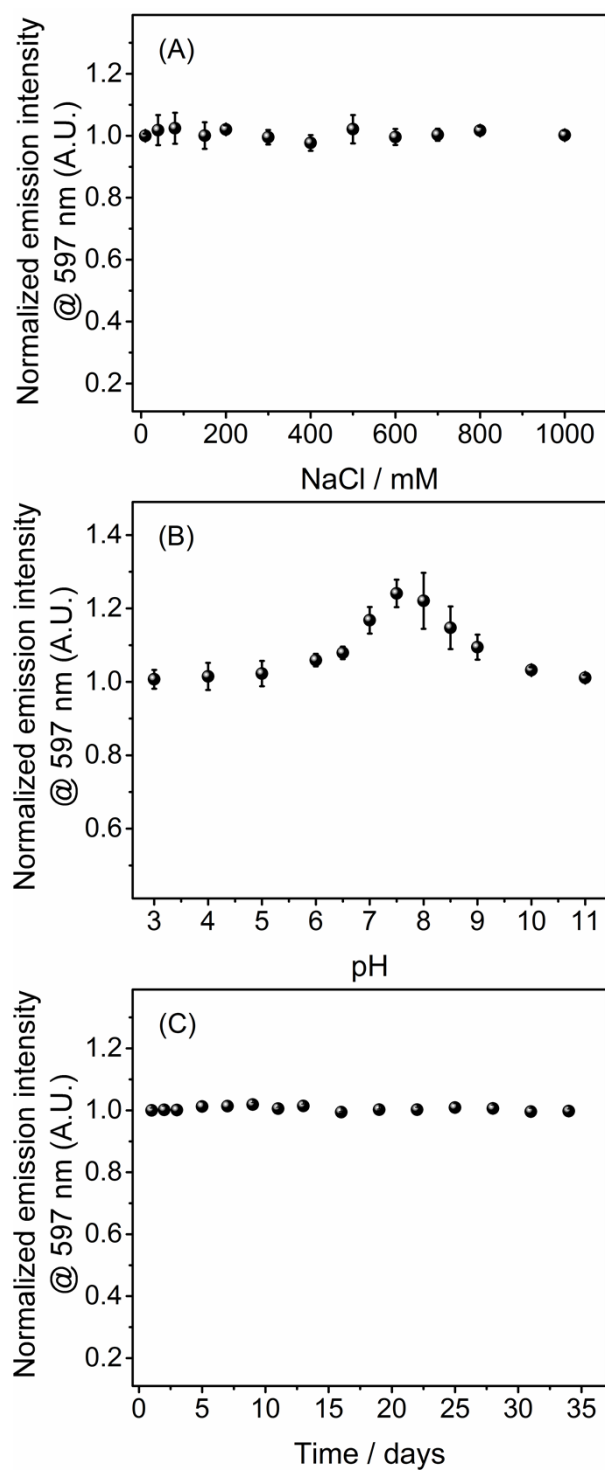

2

3 **Figure S20.** Investigation of the stability of GOD-capped Mn-ZnS QDs against salinity (a),

4 pH (b), and storage time (c) based on its phosphorescence intensity.

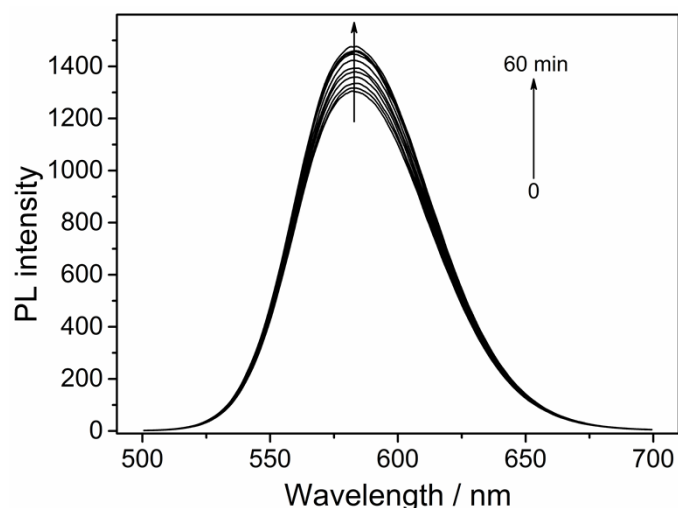

1

2 **Figure S21.** Photostability investigation of GOD-capped Mn-ZnS QDs upon continuously  
 3 irradiated with 310 nm UV light for varied time. The emission spectra were recorded at  
 4 different time points (0, 5, 10, 15, 20, 25, 30, 35, 40, 45, 50, 55, and 60 min).

5

## 6 **5. Investigation of role of GOD in synthesis of Mn-doped ZnS QDs**

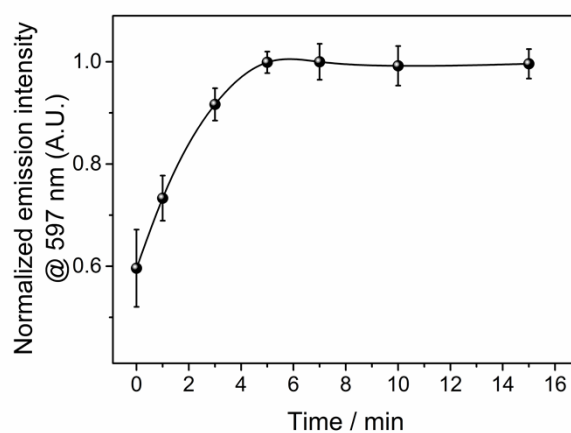

7

8 **Figure S22.** Effect of biomineralization time of GOD and cation precursors ( $Zn^{2+}$  and  
 9  $Mn^{2+}$ ) on the phosphorescence intensity of the eventual Mn-ZnS QDs.

10

### 11 Polyacrylamide gel electrophoresis

12 12  $\mu L$  free GOD ( $1.8 \text{ mg mL}^{-1}$ ) and GOD-QDs sample were mixed with 4  $\mu L$  4  $\times$   
 13 loading buffer and then loaded into polyacrylamide gel respectively. 1 $\times$ Tris-Gly  
 14 buffer was used as the running buffer. The stacking gel was 5% and separation gel

1 12%. The gel was run for 40 min at constant voltage of 100 V in stacking gel and then  
2 run for 3 h at constant voltage of 120 V in separation gel. The gel was subsequently  
3 stained with 0.25% Coomassie brilliant blue R-250 in 50% ethanol and 10% acetic  
4 acid for 1 h and destained in 25% ethanol and 8% acetic acid for 24 h in an orbital  
5 shaker (TS-2, QILINBEIER) with the speed of 80 rpm before the digital image  
6 acquisition.

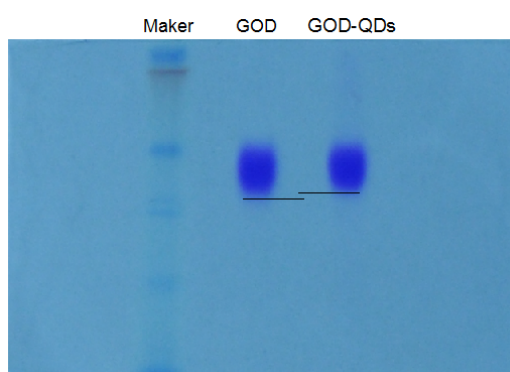

7  
8 **Figure S23.** Image of the polyacrylamide gel electrophoresis of free GOD and GOD-QDs.  
9 The blue bands is the Coomassie brilliant blue-stained image.

10

#### 11 Chemical modification of amino acid residues in GOD molecules<sup>[S2]</sup>

12 GOD powder was dissolved in ultrapure water to the concentration of 20 mg mL<sup>-1</sup>;  
13 DEPC was diluted in anhydrous ethanol; N-ethylmaleimide was dissolved in 1/100 (v  
14 / v) DMSO / H<sub>2</sub>O solution; NHS was dissolved in DMSO; EDC was dissolved in  
15 water; NAI was dissolved in 1/2 (v / v) DMSO/H<sub>2</sub>O solution; and methylamine (40%  
16 w / w aq. Soln) of 12.88 M was directly used. All the materials above were freshly  
17 prepared for GOD modification. The total reaction volume of each chemical  
18 modification reaction is 500 μL. The GOD concentration is 10 mg mL<sup>-1</sup>.

19 One equivalent of DEPC was used to modify the imidazole groups of histidine;  
20 10 equivalents of NHS were used to modify the amino groups (-NH<sub>2</sub>) of lysine and

1 the N terminus; 10 equivalents of N-ethylmaleimide were used to modify the thiol  
 2 groups (-SH) of cysteine; 10 equivalents of EDC and 50 equivalents of methylamine  
 3 were used to modify the carboxylic groups (-COOH) of glutamic acid, aspartic acid,  
 4 and the C terminus; 10 equivalents of NAI were used to modify the hydroxyl groups  
 5 (-OH) of tyrosine, serine, and threonine.

6 After each reaction, the modified GOD product was purified thrice with an YM-  
 7 30 ultrafilter via centrifugation at 8000 rpm for 10 min. The purified product was then  
 8 recovered to the 500  $\mu$ L in ultrapure water for QDs synthesis. The protocol for QDs  
 9 synthesis with chemically modified GOD is the same as unmodified GOD. Below is  
 10 the specific chemical modification strategies.

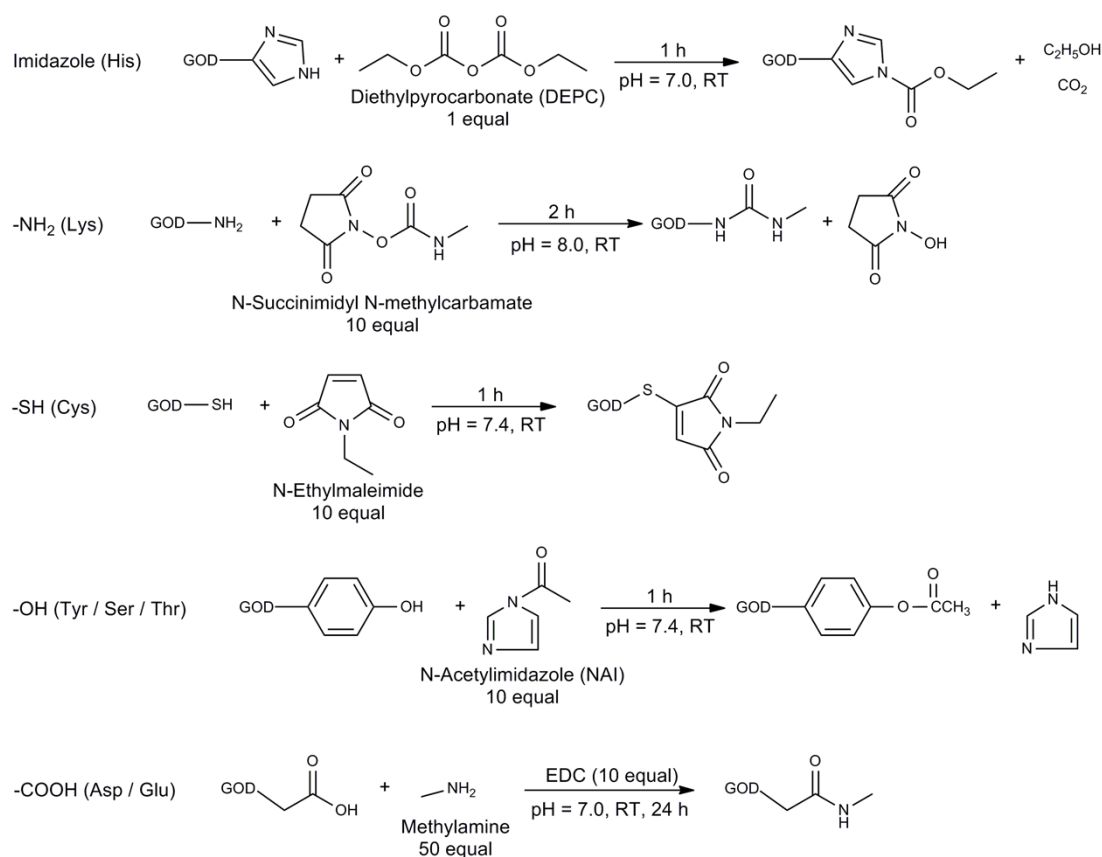

11  
 12 **Figure S24.** Chemical reactions for modification of five types of amino acid residues  
 13 (imidazole, -NH<sub>2</sub>, -SH, -OH, and -COOH).

## GOD sequence (1230 aa)

### Chain A

```
1  MAILNSMYNN  VSPLQCTSPF  LGGPQLTDVC  SASNGELFLA  LLNFFVATSP  VIGEPQQRVH
61  SSRIPDLSYD  FIVVGGGAAR  AVVAGRLSEV  SNWKVLLLEA  GPDEPAGAEI  PSNLQLYLGG
121 DLDWKYYTTN  ESHACLSTGG  SCYWPRGKNL  GGTTLHHGMA  YHRGHRKDYE  RWVQQGAFGW
181 SWDEVMPYYL  KSENTELSR  VGTKYHRSGG  LMNVERFPYQ  PPFawkILKA  AEEAGFGVSE
241 DLSGDRINGF  TVAQTISRNG  VRLSSARAFI  TPFENRNLH  VIVNATVTKV  RTLNKRATGV
301 NVLINGRRRI  IFARREVILS  AGSVNTPQLL  MLSGIGPKEH  LRSLGIPVVV  DLPGVGENLH
361 NHQSFQGMDFS  LNEDFYPTFN  QTNVDQYLYN  QTGPLSSTGL  AQVTGIWHSN  LTPDDPDIQ
421 IFFAGYQAIC  KPCLKIADLS  AHDKQAVRMS  ALNVQPTSKG  RITLNSKDPL  DPPVIWSNDL
481 ATEHDRSVM  I  QAIRVVQKLV  NTTVMRDLGV  EFQKIELKQC  DEFVEDSDDY  WNCVIQYNTR
541 AENHQTGTAK  MGPSYDPM  AV  VSPRLKVHGI  RGLRVADASV  QPQVISGNPV  ASVNMVGERA
601 ADFIKEDWGE  LLQLL
```

### Chain B

```
1  MAILNSMYNN  VSPLQCTSPF  LGGPQLTDVC  SASNGELFLA  LLNFFVATSP  VIGEPQQRVH
61  SSRIPDLSYD  FIVVGGGAAR  AVVAGRLSEV  SNWKVLLLEA  GPDEPAGAEI  PSNLQLYLGG
121 DLDWKYYTTN  ESHACLSTGG  SCYWPRGKNL  GGTTLHHGMA  YHRGHRKDYE  RWVQQGAFGW
181 SWDEVMPYYL  KSENTELSR  VGTKYHRSGG  LMNVERFPYQ  PPFawkILKA  AEEAGFGVSE
241 DLSGDRINGF  TVAQTISRNG  VRLSSARAFI  TPFENRNLH  VIVNATVTKV  RTLNKRATGV
301 NVLINGRRRI  IFARREVILS  AGSVNTPQLL  MLSGIGPKEH  LRSLGIPVVV  DLPGVGENLH
361 NHQSFQGMDFS  LNEDFYPTFN  QTNVDQYLYN  QTGPLSSTGL  AQVTGIWHSN  LTPDDPDIQ
421 IFFAGYQAIC  KPCLKIADLS  AHDKQAVRMS  ALNVQPTSKG  RITLNSKDPL  DPPVIWSNDL
481 ATEHDRSVM  I  QAIRVVQKLV  NTTVMRDLGV  EFQKIELKQC  DEFVEDSDDY  WNCVIQYNTR
541 AENHQTGTAK  MGPSYDPM  AV  VSPRLKVHGI  RGLRVADASV  QPQVISGNPV  ASVNMVGERA
1 601 ADFIKEDWGE  LLQLL
```

2 **Figure S25.** Amino acid sequences of GOD (from the database of the National Center for  
3 Biotechnology Information).

4

5

6

### BSA sequence (585 aa)

```
1 DTHKSEIAHR FKDLGEEHFK GLVLIAFSQY LQQCPFDEHV KLVNELTEFA KTCVADESHA
61 GCEKSLHTLF GDELCKVASL RETYGDMA DC CEKQEPERNE CFLSHKDDSP DLPKLPDPN
121 TLCDEFKADE KKFHWGKLYE IARRHPYFYA PELLYYANKY NGVFQECQA EDKGACLLPK
181 IETMREKVL T SSARQLRCA SIQKFGERAL KAWSVARLSQ KFPKAEFVEV TKLVTDLTKV
241 HKECCHGDL ECADDRADLA KYICDNQDTI SSKLKECCDK PLLEKSHCIA EVEKDAIPEN
301 LPPLTADFAE DKDVCKNYQE AKDAFLGSFL YEYSRRHPEY AVSVLLRLAK EYEATLEEC
361 AKDDPHACYS TVFDKLGHLV DEPQNLIKQN CDQFEKLGEY GFQNALIVRY TRKVPQVSTP
421 TLVEVSRSLG KVGTRCCTKP ESERMPCTED YLSLILNRLC VLHEKTPVSE KVTKCCTESL
481 VNRRCPCFSA L TPDETYVPKA FDEKLFTFHA DICTLPDTEK QIKKQTALVE LLKHKPKATE
541 EQLKTMENF VAFVDKCCAA DDKEACFAVE GPKLVVSTQT ALA
```

### Papain sequence (347 aa)

```
1 MAMIPSISKL LFVAICLFVY MGLSFGDFSI VGYSQNDLTS TERLIQLFES WMLKHNKIYK
61 NIDEKIYRFE IFKDNLKYID ETNKKNSYW LGLNVFADMS NDEFKEKYTG SIAGNYTTTE
121 LSYEEVLNDG DVNIPEYVDW RQKGAVTPVK NQGSCGSCWA FSAVVTIEGI IKIRTGNLNE
181 YSEQELLD CD RRSYGCNGGY PWSALQLVAQ YGIHYRNTYP YEGVQRYCRS REKGPYAAKT
241 DGVRQVQPYN EGALLYSIAN QPVSVVLEAA GKDFQLYRGG IFVGPCGNKV DHAVAAVGYG
301 PNYILIKNSW GTGWGENGYI RIKRGTGNSY GVCGLYTSSF YPVKN
```

### Pepsin sequence (339 aa)

```
1 VEEGKTHPY NPAAKFYSSG TESMTNDADL SYYG TISIGT PPQSFSVIFD TGSSNLWVPS
61 VYCNSTACEN HNQFNPSQSS TFQWGNQSL S IQYGTGSMTG FLGSDTVEVG GISVANQVFG
121 LSQTEASFMT YMQADGILGL AFQSIASDNV VPVFNTMITE GLVSEPIFSV YLSGNSEQGS
181 EVVFGGTDST HYTG TITWIP LSSATYWQIN MDSVTINGQT VACSGGCQAI IDTG TSLIVG
241 PTTDINNLNS WVGASTDQSG DAIVNCQNI P SMPDVTFTLN GNAFTVPASA YVSQSSSGCM
301 TGFGQGGTMQ LWILGDVFIR EYYAVFNAQT QNIGLAKSA
```

### Lysozyme sequence (147 aa)

```
1 MKALIILGFL FLSVAVQGV FERCELARTL KKLGLDGYKG VSLANWLCLT KWESSYNTKA
61 TNYNPSSEST DYGIFQINSK WWCNDGKTPN AVDGCHVSCS ELMENDIAKA VACA KHVISE
1 121 QGITAWVAWK SHCRDHDVSS YVQGCTL
```

2 **Figure S26.** Amino acid sequences of BSA, papain, pepsin, and lysozyme (from the  
3 database of the National Center for Biotechnology Information).

4

5

6

7

8

9

10

11

1 **Table S2.** The characteristics of five model proteins

| Proteins        | BSA          | Pepsin       | Papain       | Lysozyme (14 |
|-----------------|--------------|--------------|--------------|--------------|
| Amino acid      | (66 kDa)     | (35 kDa)     | (23 kDa)     | kDa)         |
| His             | 17           | 3            | 3            | 4            |
| Asp / Glu       | 40 / 59      | 14 / 11      | 15 / 20      | 7 / 7        |
| Lys             | 59           | 4            | 21           | 12           |
| Tyr / Ser / Thr | 20 / 28 / 34 | 13 / 44 / 34 | 28 / 24 / 15 | 5 / 14 / 8   |
| Cys             | 35           | 6            | 8            | 8            |

2

3

4 **Table S3.** Occurrences of critical amino acid residues in BSA, pepsin, papain and  
5 lysozyme sequence

| Amino acids    | His         | Asp / Glu | Lys                 | Tyr / Ser / Thr | Cys   |
|----------------|-------------|-----------|---------------------|-----------------|-------|
| (number of aa) | (imidazole) | (-COOH)   | (-NH <sub>2</sub> ) | (-OH)           | (-SH) |
| BSA (%)        | 2.9         | 17        | 10.1                | 14              | 6     |
| Pepsin (%)     | 0.9         | 7.4       | 1.2                 | 26.8            | 1.8   |
| Papain (%)     | 0.9         | 10.1      | 6.1                 | 19.4            | 2.3   |
| Lysozyme (%)   | 2.7         | 9.5       | 8.2                 | 18.4            | 5.4   |

6

7

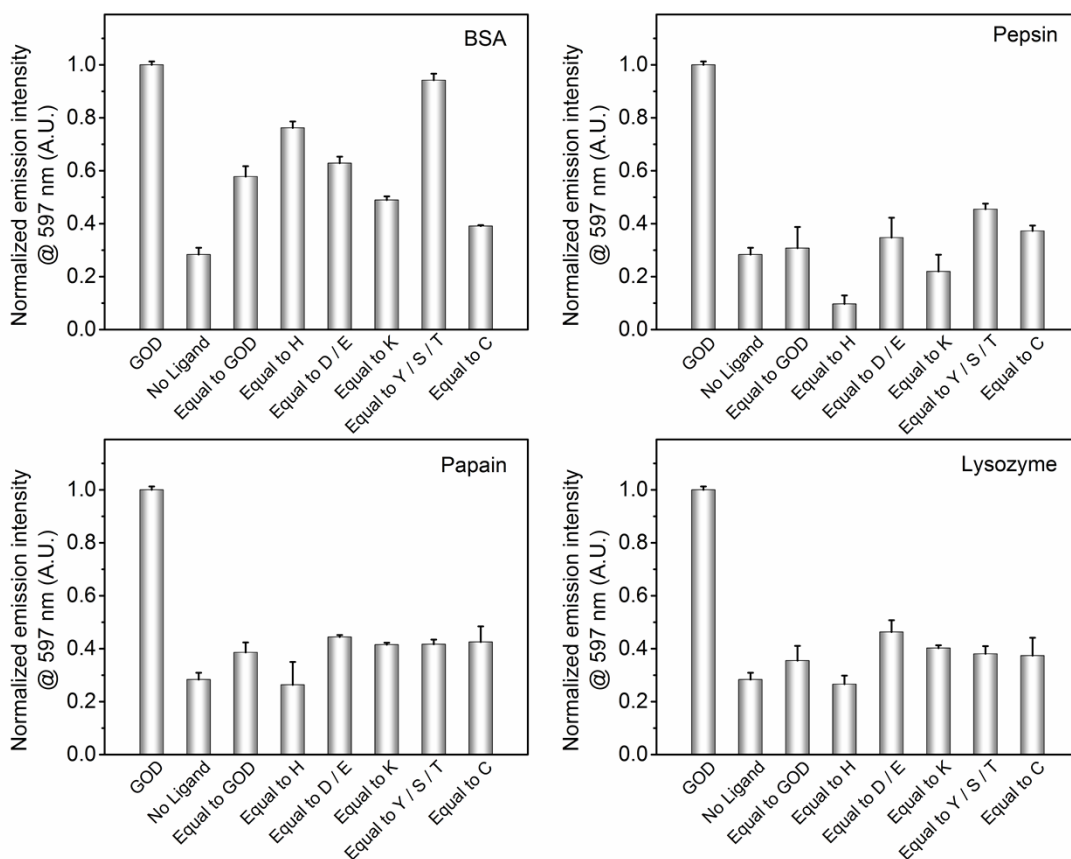

1

2 **Figure S27.** Normalized phosphorescence intensity of Mn-ZnS QDs directed with BSA,  
 3 pepsin, papain, and lysozyme with the conditions of six sets experiments (Tris-HCl, pH  
 4 6.5, 0.01M, and instant). GOD-directed synthesis and QDs synthesized without ligands  
 5 were performed as control.

6

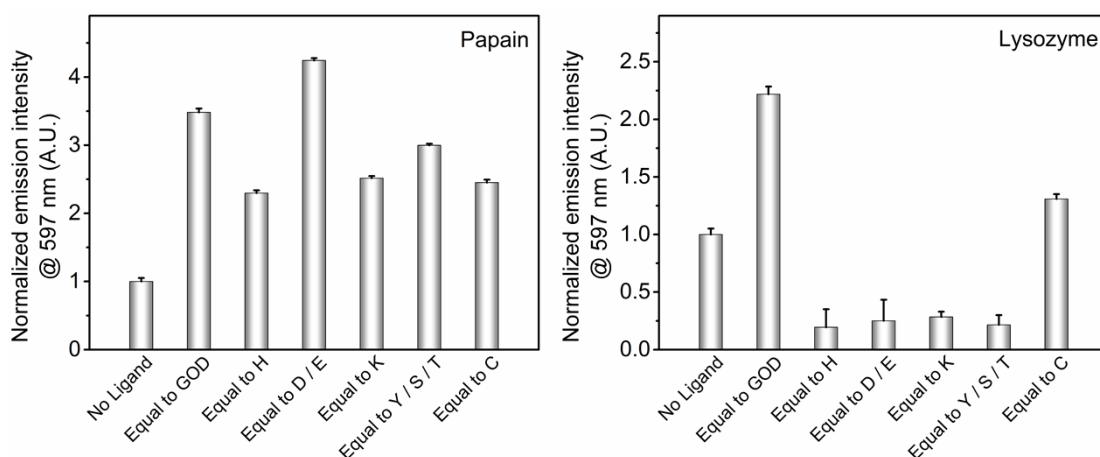

7

8 **Figure S28.** Normalized phosphorescence intensity of Mn-ZnS QDs directed with papain  
 9 and lysozyme with the conditions of six sets experiments ( $\text{NH}_4\text{HCO}_3$  solution, 0.02 M, pH  
 10 = 12, adjusted by using NaOH solution).



## 1 5. Analytical performance of GOD-Mn-ZnS QDs for glucose sensing

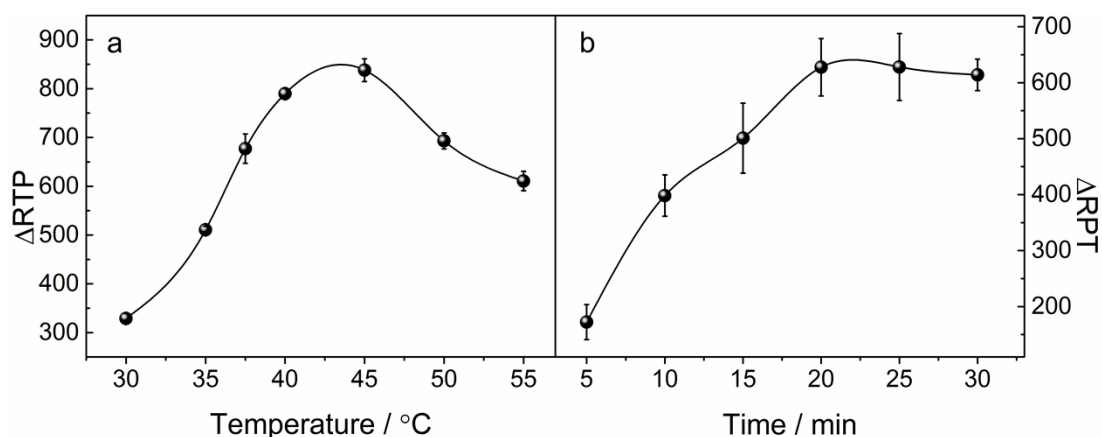

2

3 **Figure S29.** a) Effect of the temperature of GOD-mediated Mn-doped ZnS QDs  
4 incubating with 200  $\mu\text{M}$  glucose and b) incubation time.

5

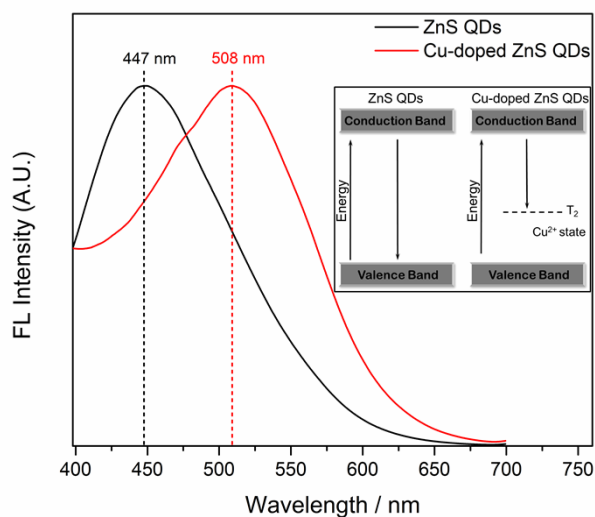

6

7 **Figure S30.** Fluorescence Emission spectra (Ex: 310 nm) of GOD-ZnS QDs and GOD-  
8 Cu-doped ZnS QDs. Doping Cu into ZnS host resulted in res-shifting of the host emission,  
9 which is arisen from the recombination from the conduction band to the  $\text{Cu}^{2+}$   $T_2$  state  
10 (inset of Figure S30).

11

**Table S4.** Effect of existing substances on GOD-mediated Mn-doped ZnS QDs

| Existing substances | Concentration (M) <sup>a</sup> | Changed in the RTP intensity (%) |
|---------------------|--------------------------------|----------------------------------|
| Maltose             | $1 \times 10^{-2}$             | -2.0                             |
| Fructose            | $1 \times 10^{-2}$             | -3.4                             |

---

|                  |                      |      |
|------------------|----------------------|------|
| Sucrose          | $1 \times 10^{-2}$   | -5.0 |
| Alanine          | $4 \times 10^{-3}$   | -2.2 |
| Arginine         | $4 \times 10^{-4}$   | 2.0  |
| Histidine        | $1 \times 10^{-3}$   | -3.6 |
| Lysine           | $5 \times 10^{-4}$   | 3.6  |
| Glycine          | $1 \times 10^{-3}$   | -3.2 |
| Valine           | $1 \times 10^{-3}$   | -4.6 |
| Histidine        | $1 \times 10^{-3}$   | -3.6 |
| Lysine           | $5 \times 10^{-4}$   | 3.6  |
| Ascorbic acid    | $2.5 \times 10^{-5}$ | -3.9 |
| Glutathione      | $2 \times 10^{-4}$   | 0.3  |
| L-cysteine       | $5 \times 10^{-4}$   | 3.0  |
| Glutamic acid    | $2 \times 10^{-3}$   | -3.0 |
| Glycine          | $1 \times 10^{-3}$   | -3.2 |
| Tyrosine         | $2 \times 10^{-4}$   | -3.8 |
| Phenylalanine    | $5 \times 10^{-4}$   | -5.7 |
| Leucine          | $2 \times 10^{-3}$   | -4.2 |
| Proline          | $5 \times 10^{-4}$   | -1.5 |
| Serine           | $1 \times 10^{-3}$   | -4.6 |
| Tryptophan       | $2 \times 10^{-4}$   | -5.2 |
| Aspartic acid    | $2 \times 10^{-4}$   | -5.4 |
| Oxalic           | $1 \times 10^{-3}$   | 4.4  |
| Methionine       | $2 \times 10^{-4}$   | -5.4 |
| Threonine        | $2 \times 10^{-4}$   | -3.1 |
| HSA              | $3 \times 10^{-7}$   | 3.1  |
| Citrate          | $2.5 \times 10^{-5}$ | 3.4  |
| K <sup>+</sup>   | $1 \times 10^{-2}$   | 0.6  |
| Na <sup>+</sup>  | $4 \times 10^{-2}$   | -2.5 |
| Fe <sup>3+</sup> | $2 \times 10^{-6}$   | 0.3  |
| Zn <sup>2+</sup> | $1 \times 10^{-5}$   | 4.1  |
| Mg <sup>2+</sup> | $7.5 \times 10^{-4}$ | -7.2 |
| Co <sup>2+</sup> | $1 \times 10^{-6}$   | -1.1 |
| Mn <sup>2+</sup> | $1 \times 10^{-6}$   | 1.4  |
| Cu <sup>2+</sup> | $3 \times 10^{-7}$   | -0.7 |
| Ca <sup>2+</sup> | $5 \times 10^{-4}$   | 1.0  |

---

1

2 References

3 [S1] G. M. Dalpian and J. R. Chelikowsky, *Phys. Rev. Lett.*, 2006, **96**, 226802.

4 [S2] He, X. W.; Gao, L.; Ma, N. *Sci. Rep.*, 2013, 3, 2825.
